# Mystery of fatal ‘Staggering disease’ unravelled: Novel rustrela virus causes severe encephalomyelitis in domestic cats

Kaspar Matiasek<sup>1</sup>, Florian Pfaff<sup>2</sup>, Herbert Weissenböck<sup>3</sup>, Claudia Wylezich<sup>2</sup>, Jolanta Kolodziejek<sup>4</sup>, Sofia Tengstrand<sup>5</sup>, Frauke Ecke<sup>6</sup>, Sina Nippert<sup>7</sup>, Philip Starcky<sup>2</sup>, Benedikt Litz<sup>2</sup>, Jasmin Nessler<sup>8</sup>, Peter Wohlsein<sup>9</sup>, Christina Baumbach<sup>10</sup>, Lars Mundhenk<sup>11</sup>, Andrea Aebischer<sup>12</sup>, Sven Reiche<sup>12</sup>, Pia Weidinger<sup>4</sup>, Karin M. Olofsson<sup>13</sup>, Cecilia Rohdin<sup>14,15</sup>, Christiane Weissenbacher-Lang<sup>3</sup>, Julia Matt<sup>3</sup>, Marco Rosati<sup>1</sup>, Thomas Flegel<sup>16</sup>, Birger Hörnfeldt<sup>6</sup>, Dirk Höper<sup>2</sup>, Rainer G. Ulrich<sup>7,17</sup>, Norbert Nowotny<sup>4,18</sup>, Martin Beer<sup>2</sup>, Cecilia Ley<sup>5,13</sup>, Dennis Rubbenstroth<sup>2,\*</sup>

<sup>1</sup>Section of Clinical & Comparative Neuropathology, Institute of Veterinary Pathology, Centre for Clinical Veterinary Medicine, Ludwig-Maximilians-Universität München, Munich, Germany

<sup>2</sup>Institute of Diagnostic Virology, Friedrich-Loeffler-Institut, Greifswald-Insel Riems, Germany

<sup>3</sup>Institute of Pathology, University of Veterinary Medicine Vienna, Vienna, Austria

<sup>4</sup>Institute of Virology, University of Veterinary Medicine Vienna, Vienna, Austria

<sup>5</sup>Department of Biomedical Sciences and Veterinary Public Health, Swedish University of Agricultural Sciences (SLU), Uppsala, Sweden

<sup>6</sup>Department of Wildlife, Fish and Environmental Studies, Swedish University of Agricultural Sciences (SLU), Umeå, Sweden

<sup>7</sup>Institute of Novel and Emerging Infectious Diseases, Friedrich-Loeffler-Institut, Greifswald-Insel Riems, Germany

<sup>8</sup>Department of Small Animal Medicine and Surgery, University of Veterinary Medicine Hannover, Hannover, Germany

<sup>9</sup>Department of Pathology, University of Veterinary Medicine Hannover, Hannover, Germany

<sup>10</sup>State Office for Agriculture, Food Safety and Fisheries, Rostock, Germany

<sup>11</sup>Institute of Veterinary Pathology, Freie Universität Berlin, Berlin, Germany

<sup>12</sup>Department of Experimental Animal Facilities and Biorisk Management, Friedrich-Loeffler-Institut, Greifswald-Insel Riems, Germany

<sup>13</sup>Department of Pathology and Wildlife Diseases, National Veterinary Institute (SVA), Uppsala, Sweden

<sup>14</sup>Department of Clinical Sciences, Swedish University of Agricultural Sciences (SLU), Uppsala, Sweden

<sup>15</sup>Anicura, Albano Small Animal Hospital, Danderyd, Sweden

<sup>16</sup>Department of Small Animal Medicine, Leipzig University, Leipzig, Germany

<sup>17</sup>German Centre for Infection Research (DZIF), Partner site Hamburg-Lübeck-Borstel-Riems, Greifswald-Insel Riems, Germany

<sup>18</sup>College of Medicine, Mohammed Bin Rashid University of Medicine and Health Sciences, Dubai, United Arab Emirates.

**\*Corresponding author:**

Dennis Rubbenstroth, [Dennis.Rubbenstroth@fli.de](mailto:Dennis.Rubbenstroth@fli.de), Tel.: +49-38351-7-1521

39 **ABSTRACT**

40 'Staggering disease' is a neurological disorder considered a threat to European domestic cats (*Felis*  
41 *catus*) for almost five decades. However, its aetiology has remained obscure. Rustrela virus (RusV),  
42 a relative of rubella virus, has recently been shown to be associated with encephalitis in a broad  
43 range of mammalian hosts. Here, we report the detection of RusV RNA and antigen by metagenomic  
44 sequencing, RT-qPCR, *in-situ* hybridization and immunohistochemistry in brain tissues of 28 out of  
45 29 cats with non-suppurative meningoencephalomyelitis and 'staggering disease'-like neurological  
46 disorder from Sweden, Austria, and Germany, but not in non-affected control cats. Screening of  
47 possible reservoir hosts in Sweden revealed RusV infection in wood mice (*Apodemus sylvaticus*).  
48 Our work strongly indicates RusV as the long-sought cause of feline 'staggering disease'. Given its  
49 broad host spectrum and considerable geographic range, RusV may be the aetiological agent of  
50 neuropathologies in further mammals, possibly even including humans.

51

## 52 INTRODUCTION

53 Throughout mammalian species, inflammatory disorders of the central nervous system (CNS) are  
54 associated with substantial suffering, mortality and long-term neurological deficits.  
55 Aetiopathogenically, they can be broadly categorised into infectious and immune-mediated  
56 disorders<sup>1</sup>. All too often, however, the cause of an encephalitis remains unknown and leaves  
57 clinicians, patients and owners of affected pets with considerable uncertainty about its origin,  
58 treatment options and, hence, prognosis. The latter holds true particularly for the large  
59 histopathologically convergent panel of non-suppurative, lymphohistiocytic encephalitides. A  
60 considerable proportion of these cases remains unsolved using conventional diagnostic methods,  
61 such as immunohistochemistry (IHC), *in-situ* hybridization (ISH), and polymerase chain reaction  
62 (PCR) techniques for regional neurotropic pathogens<sup>2, 3, 4, 5, 6</sup>.

63 One of those controversial encephalitides of possibly infectious origin is the so-called ‘staggering  
64 disease’ of domestic cats (*Felis catus*). It has been described first in the 1970s in the Swedish Lake  
65 Mälaren region between Stockholm and Uppsala<sup>7</sup>, which remains a hotspot of ‘staggering disease’  
66 to the present. Neurologic disorders possessing striking similarity with this disease entity have been  
67 described also in domestic cats in other European countries, particularly in Austria<sup>6, 8, 9, 10, 11</sup>, and  
68 even in other felids<sup>12, 13</sup>.

69 The most prototypic clinical sign is hind leg ataxia with a generally increased muscle tone resulting  
70 in a staggering gait. In addition, a broad range of other neurologic signs may occur, including the  
71 inability to retract the claws, hyperaesthesia and occasionally tremors and seizures. Behavioural  
72 alterations may range from enhanced vocalization, depression and becoming more affectionate to  
73 rarely aggression<sup>7, 8, 14, 15</sup>. The disease progression usually lasts a few days to a few weeks, but may  
74 also continue for more than a year, and it generally results in euthanasia— for animal welfare  
75 reasons. The histopathology of ‘staggering disease’ is characterized by a non-suppurative,  
76 predominantly lymphohistiocytic meningoencephalomyelitis with angiocentric immune cell invasion  
77 and perivascular cuffing predominantly in the grey matter of the CNS<sup>7, 8, 14, 15, 16</sup>.

78 While the microscopic pattern has suggested a viral origin of ‘staggering disease’, its aetiological  
79 agent has remained undisclosed for almost five decades. Borna disease virus 1 (BoDV-1; species  
80 *Orthobornavirus bornaense*; family *Bornaviridae*), which causes neurologic disorders in various  
81 mammals including humans<sup>17</sup>, has for a long time spearheaded the panel of aetiological  
82 candidates<sup>16, 18, 19, 20, 21, 22, 23</sup>. However, results suggesting natural BoDV-1 infections in cats with  
83 ‘staggering disease’ in Sweden remained inconclusive and were later refuted on the grounds of  
84 new standards<sup>17, 24, 25</sup>.

85 Fortunately, advances in clinical metagenomics over the last years have provided us with promising  
86 tools for the detection of new or unexpected pathogens involved in hitherto unexplained  
87 encephalitides<sup>26, 27, 28, 29, 30, 31</sup>. By application of an established metagenomic workflow<sup>32</sup>, we now

88 detected rustrela virus (RusV; *Rubivirus strelense*; *Matonaviridae*) sequences in brains of cats with  
89 'staggering disease'-like neurological disorder. RusV is a recently discovered relative of rubella virus  
90 (RuV; *Rubivirus rubellae*)<sup>32</sup>, the causative agent of rubella in humans<sup>30, 33</sup>. It was first identified in  
91 the brains of various mammals in a zoo close to the Baltic Sea in Northern Germany<sup>30, 34</sup>. These  
92 animals had suffered from neurologic disorders and lymphohistiocytic encephalitis<sup>30, 31, 34</sup>. Yellow-  
93 necked field mice (*Apodemus flavicollis*) without apparent encephalitis were considered as possible  
94 reservoir hosts of the virus in that area<sup>30, 34</sup>.

95 Here, we now report the presence of RusV in the brains of cats with non-suppurative  
96 lymphohistiocytic meningoencephalomyelitis and 'staggering disease'-like disorders from Sweden,  
97 Austria, and Germany, by metagenomic analysis and further independent methods, including  
98 reverse transcription real-time PCR (RT-qPCR), ISH and IHC. In contrast, RusV was not detected in  
99 the brains of control cats without neurologic disease or with encephalopathies of other causes from  
100 the same or nearby regions. Thus, our results indicate that RusV is indeed the causative agent of  
101 long-known 'staggering disease' in domestic cats.

102

## 103 RESULTS

104

### 105 Failure to detect BoDV-1 infection in cats with 'staggering disease'

106 In an attempt to investigate the aetiology of 'staggering disease', frozen or formalin-fixed paraffin-  
107 embedded (FFPE) brain samples from 29 cats with non-suppurative encephalitis and/or the clinical  
108 presentation of 'staggering disease' from Sweden (n=15), Austria (n=9), and Germany (n=5) were  
109 examined for the presence of bornaviruses by RT-qPCR assays detecting the RNA of BoDV-1 and  
110 other orthobornaviruses<sup>27</sup>, (**Supplemental Table S1**), or by IHC using a monoclonal antibody  
111 targeting the BoDV-1 nucleoprotein (**Supplemental Figure S1**). Neither bornavirus RNA nor antigen  
112 could be detected.

113

### 114 RusV sequences identified in cats with 'staggering disease' by metagenomic analysis

115 Selected samples were subsequently analysed using a generic metagenomic sequencing  
116 workflow<sup>32</sup>. In an initial analysis using blastx, sequence reads with the highest identity to RusV were  
117 identified in 14 out of 15 tested samples from these three countries (**Table 1**). Additional high  
118 throughput sequencing (HTS), assisted by target enrichment using the panRubi myBaits set v2), a  
119 newly developed set v3 achieved complete RusV genome sequences for three cats from Sweden  
120 (animals SWE\_13, SWE\_14 and SWE\_15) and one cat from Northeastern Germany (GER\_04), as  
121 well as a complete and an almost genome sequences for two cats from Austria (AUT\_02 and  
122 AUT\_06, respectively). The newly identified RusV sequences clearly clustered with other RusV  
123 sequences when compared to related matonaviruses (**Figure 1a**), based on amino acid (aa)  
124 sequences of the structural polyprotein (p110/sPP). The genome nucleotide (nt) sequences from  
125 Austria and Sweden formed separate phylogenetic lineages in comparison to the sequences from  
126 Germany (**Figure 1b**). While sequence GER\_04 possessed at least 92.1% nt sequence identity with  
127 the previously published German RusV sequences, the minimum nt identities of the Swedish and  
128 Austrian sequences to the German sequences were only 76.7%, or 76.0%, respectively, but 80.7%  
129 to each other (**Supplemental Figure S2**). The genome organization of the newly discovered RusV  
130 sequences (**Figure 1c**) was consistent with those of previously published RusV genomes<sup>30, 34</sup>. Using  
131 a sliding window analysis, we identified a highly conserved region at the 5' terminus of the RusV  
132 genomes (approximate positions 1 to 300). Regions of particularly high variability covered the  
133 intergenic region between the p200 and p110 open reading frames (ORF) as well as a stretch of  
134 the p150-encoding sequence around nt positions 2,100-2,600 (**Figure 1c**).

135

### 136 **Detection of RusV RNA using a broadly reactive panRusV RT-qPCR assay**

137 Since the initially published RT-qPCR assay RusV Mix-1<sup>30</sup> was unable to detect RusV RNA in samples  
138 from Sweden and Austria (data not shown), we designed a new set of primers and probe targeting  
139 the highly conserved region at the 5' end of the genome (**Supplemental Figure S3; Supplemental**  
140 **Table S1**). This newly established panRusV assay readily detected RusV RNA in the brains of all 15  
141 Swedish cats with 'staggering disease', eight out of nine Austrian cats<sup>8, 11</sup>, and three out of five cats  
142 from Germany (**Table 1**). Results were moderately to strongly positive for frozen tissue (cycle of  
143 quantification [Cq] values 20 to 32), and rather weakly positive for animals where only FFPE  
144 material was available (Cq 27 to 36; **Supplemental Table S2; Supplemental Figure S4a**). In contrast,  
145 RusV RNA was not detected in frozen brain samples from 21 control cats without encephalitis  
146 originating from Sweden, Austria, and Germany, or in eight cats from Germany suffering from other  
147 types of encephalitis (**Table 1**).

148

### 149 **Detection of RusV RNA and antigen in neural tissue by ISH and IHC**

150 To confirm and further characterize RusV infection in the cats, we employed viral RNA detection by  
151 ISH and antigen detection by IHC (**Figure 2**). An RNAscope ISH probe was designed to target the  
152 highly conserved stretch at the 5' terminus of the RusV genome (**Supplemental Figure S3**). Specific  
153 ISH staining was observed for 22 out of 26 tested cats from all three countries (**Table 1; Figures 2a**  
154 **to d**). Two animals revealed inconclusive results and two were ISH-negative (**Supplemental Table**  
155 **S2**).

156 In addition, we performed IHC using a newly generated mouse monoclonal antibody targeting the  
157 RusV capsid protein. Specific immunopositivity mirroring the ISH pattern (**Figures 2e to h**) was seen  
158 in 27 out of 29 analysed cats with 'staggering disease', but not in any brain from 18 tested control  
159 cats (**Table 1**). IHC identified RusV antigen in two cases that had been negative by RT-qPCR from  
160 FFPE brain tissue (AUT\_03 and GER\_02), whereas one RT-qPCR-positive individual (AUT\_05)  
161 remained negative by IHC (**Supplemental Table S2**).

162 By both, ISH and IHC, a specific granular chromogen staining was observed predominantly in  
163 perikarya of pyramidal neurons of cerebral cortices, namely of isocortex (**Figures 2c, g**) and  
164 hippocampus proper (**Figure 2f**), granule cells of dentate gyrus (**Figure 2b**), Purkinje cells of the  
165 cerebellum (**Figures 2a, e**), multipolar neurons of brain stem and cerebellar roof, and in ventral  
166 horn neurons of the spinal cord (**Figures 2d, h**). On occasion, cytoplasmic immunoreactivity was  
167 also noted in individual interposed neuroglial and microglial cells. In addition, some small dot-like  
168 reactions were spotted in a scattered pattern amongst the neuropil and white matter. Notably, viral  
169 RNA and protein often did not colocalize with inflammatory lesions (**Figure 2f**).

170

## 171 **Demographic data, clinical disease and histopathology of RusV-infected cats**

172 Among the 29 cats in this study that met the criteria of ‘staggering disease’, 28 cats were identified  
173 as RusV-positive by at least one of the employed methods (**Table 1; Supplemental Table S2**).  
174 Twenty-two (78.6%) of them were neutered or intact males (**Supplemental Table S3**), which is  
175 consistent with previous studies on ‘staggering disease’<sup>14, 15, 35</sup>. All affected animals were adults,  
176 with a median age of 3.1 years (range 1.5 to 12.3; **Supplemental Figure S5a; Supplemental Table**  
177 **S3**), and all had outdoor access (where reported) (**Supplemental Table S3**). The onset of disease  
178 had occurred more often in winter and spring (December to May: 18 cases) as compared to summer  
179 and autumn (June to November: 8 cases; **Supplemental Figure S5b; Supplemental Table S3**).

180 Typically observed clinical signs included gradually deteriorating gait abnormalities, with abnormal  
181 posture, stiff gait, ataxia, hind limb-predominant weakness progressing to non-ambulatory  
182 tetraparesis and proprioceptive deficits. In addition, fever, behavioural changes such as abnormal  
183 vocalization or affectionate behaviour, hypersalivation, depression, hyperaesthesia in dorsal back  
184 and lumbar/tail region, reduced spinal reflexes and postural reactions, affection of cranial nerves  
185 and opisthotonus were reported in some of the cases. In one animal, generalized seizures were  
186 specifically recorded (**Supplemental Table S4**)<sup>6, 8</sup>. Duration from the reported disease onset to  
187 euthanasia ranged from one week to more than one year, with most of the cats being euthanized  
188 within less than two months (median two weeks) (**Supplemental Figure S5c; Supplemental Table**  
189 **S3**).

190 In congruence with previous reports on ‘staggering disease’<sup>8, 11, 15</sup>, histopathological examination  
191 of brain and spinal cord revealed widespread, polio-predominant angiocentric lymphocytic and/or  
192 lymphohistiocytic infiltrates throughout the cases (**Figures 3 and 4; Supplemental Table S4**).  
193 Occasionally, they were accompanied by oligofocal astrogliosis and microglial proliferates, a few  
194 degenerating neurons and neuronophagic nodules (**Figure 4**). Inflammation was most pronounced  
195 in the brain stem (**Figures 3a, 4b, c**), cerebral cortices (**Figures 3b, c**), and all levels of the spinal  
196 cord, while – independent of the ISH and IHC signal (**Figures 2a, e**) – they were less evident in the  
197 cerebellum (**Figure 3a**). Apart from the parenchyma, lymphohistiocytic infiltrates and fewer plasma  
198 cells were present also in the leptomeninges (**Figure 3a**). Potentially viral inclusion bodies were not  
199 observed.

200

## 201 **Detection of RusV RNA in rodents from Southern Sweden**

202 We furthermore screened brain samples from 116 rodents that had been collected between 1995  
203 and 2019 during monitoring studies near Grimsö in Örebro county (**Supplemental Figure S6**), which  
204 is situated approximately 80 km Southwest of the origin of the closest RusV-infected cat detected  
205 in this study (**Figure 5**). PanRusV RT-qPCR detected RusV RNA in eight out of 106 (7.5%) wood mice  
206 (synonym ‘long-tailed field mice’; *Apodemus sylvaticus*) with Cq values ranging from 20 to 35

207 **(Supplemental Figure S4b)**. In contrast, we did not detect RusV RNA in ten yellow-necked field mice  
208 from the same location. The positive individuals were collected in the years 1996 (n=2), 1997  
209 (n=3), 2005 (n=2), and 2011 (n=1). All positive animals had been trapped during fall season, which  
210 is consistent with the considerably higher number of wood mice trapped during fall (n=94) as  
211 compared to spring (n=12; **Supplemental Figure S6**).

212 None of the positive animals showed inflammatory lesions in their brain tissues (data not shown).  
213 Sample quality allowed for ISH analysis of brain tissue for only four RusV-positive individuals. All of  
214 them exhibited specific staining, whereas one RT-qPCR-negative wood mouse did not when tested  
215 in parallel (**Supplemental Figure S7**).

216

### 217 **Phylogenetic analysis and spatial distribution of RusV sequences from cats and wood mice**

218 To allow for a detailed phylogenetic analysis, we aimed at generating RusV sequence information  
219 for all positive cats and wood mice. However, whole RusV genome sequencing by HTS is  
220 sophisticated and laborious<sup>34</sup>. Particularly for those individuals with only FFPE material available,  
221 the generated sequences were highly fragmented. Thus, we designed primers specifically targeting  
222 a stretch of 409 nt within the highly conserved region at the 5' end of the genome to be applied for  
223 conventional RT-PCR and subsequent Sanger sequencing (**Supplemental Table S1; Supplemental**  
224 **Figure S3**). Using this approach, sufficient sequence information was generated for 23 RusV-  
225 positive cats and all eight RusV-positive wood mice. Phylogenetic analysis of these sequences  
226 together with all previously published RusV sequences revealed three clearly distinguishable clades  
227 for sequences originating from Sweden, Austria, or Northern Germany, with the Swedish and  
228 Austrian clades being more closely related to each other than to the Northern German clade (**Figure**  
229 **5a**). The Swedish clade revealed three distinguishable subclades. One subclade harboured  
230 sequences from ten cats from an area of about 9,000 km<sup>2</sup> around the city Uppsala. A second  
231 subclade included three RusV sequences from cats from the same region and all sequences from  
232 wood mice from Grimsö. The third subclade was constituted by only a single sequence from a cat  
233 from Stockholm (**Figure 5**). The sequences of both cats from Northeastern Germany belonged to  
234 the previously published Northern German clade (**Figures 5a, b**)<sup>30, 34</sup>. Surprisingly, sequence  
235 fragments available for cat GER\_01, which originated from Hannover in Central Germany, were  
236 more closely related to sequences of the Austrian clade than to the Northern German clade (**Figures**  
237 **5a, b**).

238



## 239 DISCUSSION

240 For almost five decades, ‘staggering disease’ in domestic cats had been suspected as a cohesive  
241 entity with a uniform, presumably viral, but still unknown aetiology<sup>7, 8, 11, 14, 15</sup>. While BoDV-1 had  
242 been discussed as a candidate for causing ‘staggering disease’<sup>16, 19, 21, 22, 23</sup>, proof of natural  
243 infections complying with current diagnostic standards could not be presented<sup>17, 24, 25</sup>. Here we  
244 used robust diagnostic approaches that had been demonstrated to successfully detect a broad  
245 range of orthobornaviruses, including cases of BoDV-1-induced encephalitis in humans and  
246 domestic mammals<sup>27, 36, 37, 38</sup>. Nevertheless, we were not able to detect bornavirus RNA in any of  
247 the 29 tested cats from three different countries with clinicopathological features consistent with  
248 ‘staggering disease’. Thus, our results clearly refute the hypothesis of BoDV-1 being the causative  
249 agent of ‘staggering disease’.

250 Instead, we were able to unequivocally confirm RusV infection in almost all of these cats. We  
251 consistently detected RusV RNA and antigen by employing independent diagnostic assays,  
252 including RT-qPCR, genome sequencing, ISH and IHC in the majority of these individuals. Only minor  
253 inconsistencies between results of the assays occurred, presumably due to genetic variability of  
254 the involved RusV variants, quality of the available material and differential sensitivities of the  
255 employed assays that may have led to false negative results of single tests, particularly for  
256 individuals for which only archived FFPE material was available. Experimental RusV infection of  
257 cats, to reproduce the disease and thereby fulfil Henle-Koch’s postulates, has not been performed  
258 so far due to the lack of a virus isolate. However, we demonstrate a clear association between  
259 infection and disease, with almost all animals of the ‘staggering disease’ group being RusV-positive,  
260 whereas the virus was not detected in any control cat without neurologic disease or with other types  
261 of encephalitis. Furthermore, clinical course and histopathologic lesions observed for cats with  
262 ‘staggering disease’ in this and previous studies<sup>7, 8, 14, 15</sup> closely resembled those described for  
263 other RusV-infected mammals in Germany<sup>30, 34</sup>. Thus, RusV can be considered as the causative  
264 agent of ‘staggering disease’ with high certainty.

265 We detected RusV infection of cats in the Lake Mälaren region in Sweden and Northeast of Vienna  
266 in Austria, two traditional hotspots of ‘staggering disease’<sup>7, 8, 11, 15, 35</sup>, as well as in Northern  
267 Germany, where RusV had been initially discovered<sup>30, 34</sup>, but ‘staggering disease’ had not yet been  
268 reported. Phylogenetic analyses revealed the RusV sequences from the three regions to belong to  
269 separate genetic clusters, with the Swedish and Austrian sequences being more closely related to  
270 each other than to those from Northern Germany. The considerable genetic variability with only  
271 75% minimal nt sequence identities among the different lineages posed a major challenge for the  
272 generation of broadly reactive diagnostic tools. However, a particularly conserved sequence stretch  
273 at the 5’ terminus of the genome allowed for the design and application of versatile primers and

274 probes for PCR and ISH assays. Furthermore, a monoclonal mouse antibody targeting the RusV  
275 capsid protein proved suitable for the detection of all three major RusV lineages.

276 While yellow-necked field mice are considered as putative reservoir hosts of RusV in Northern  
277 Germany<sup>30, 34</sup>, we surprisingly detected RusV in Sweden only in the closely related wood mice but  
278 not in yellow-necked field mice from the same area in Örebro county. Since the majority of tested  
279 individuals from this location were wood mice, it remains to be elucidated, whether this discrepancy  
280 is mainly a result of different species compositions of the analysed sample collections or whether  
281 it represents a diverging adaptation of RusV variants to alternative reservoir hosts.

282 The route of RusV transmission within its presumed reservoir as well as from there to other hosts  
283 remains unknown. The tissue tropism in zoo animals and yellow-necked field mice in Germany was  
284 described as restricted almost exclusively to the CNS, with occasional detection of RusV RNA in  
285 peripheral nerve fibres. Viral shedding has not been described so far<sup>30, 34</sup>. In the future, detailed  
286 data on tissue distribution needs to be obtained also for RusV-infected cats and wood mice, but  
287 this was beyond the scope of this study. Furthermore, the possibility of RusV shedding by infected  
288 cats remains to be elucidated. However, the apparently spatially restricted occurrence of the  
289 phylogenetic clusters argues in favour of a continuous viral spread only within a locally bound  
290 reservoir, including small mammals, whereas more mobile hosts, including domestic animals that  
291 may be transported over long distances, serve predominantly as erroneous dead-end hosts. Similar  
292 patterns have been evidenced for rodent and shrew reservoir-bound viruses such as BoDV-1, rat  
293 hepatitis E virus or Puumala orthohantavirus<sup>25, 39, 40, 41</sup>. The sporadic occurrence of ‘staggering  
294 disease’ in domestic cat populations, the apparent lack of outbreak series within cat holdings, as  
295 well as the almost exclusive restriction to cats with outdoor access, often originating from rural  
296 areas, further support this assumption<sup>8, 14, 15, 35</sup>.

297 Previous studies had also suggested a seasonal occurrence of ‘staggering disease’ with more cases  
298 in winter and spring than summer and autumn<sup>15</sup>. Although higher case numbers and a more  
299 systematic sampling scheme are required for solid statistical evaluation, the same tendency was  
300 observed also in our study. This seasonal pattern may be attributable to fluctuating reservoir  
301 populations. During the small mammal monitoring in Grimsö, Sweden, numbers of *Apodemus* spp.  
302 trapped in fall were much higher than in spring. In addition, movement of small rodents towards  
303 and into human dwellings during winter is frequently reported and has been discussed to be  
304 associated with transmission of zoonotic pathogens such as Puumala orthohantavirus to  
305 humans<sup>42</sup>. Increased exposure to *Apodemus* spp. during fall and winter might also facilitate RusV  
306 transmission to cats. However, since the incubation period of RusV-induced disease is unknown,  
307 time points of infection cannot be reliably estimated so far. Changes of reservoir populations may  
308 also explain long-term temporal patterns of ‘staggering disease’ occurrence. While cases have been  
309 continuously observed in the Swedish Lake Mälaren region from at least the 1970s until today<sup>7, 15</sup>.

310 <sup>22, 23, 35</sup>, ‘staggering disease’ in the districts north-east of Vienna has been diagnosed mainly during  
311 the early 1990s<sup>8, 11</sup>, but appears to have ceased thereafter.

312 In summary, we provide convincing evidence of an association of RusV infection with ‘staggering  
313 disease’ in cats, strongly supporting a causative role. Our results demonstrate a much broader  
314 genetic diversity and spatial distribution of RusV than initially appreciated, and we identified the  
315 wood mouse as an additional potential reservoir host. The availability of broadly reactive diagnostic  
316 tools may lead to the detection of RusV in encephalitic cats also in regions where ‘staggering  
317 disease’ has not been evident before. Furthermore, given the broad range of affected zoo animals<sup>30,</sup>  
318 <sup>34</sup>, RusV may be found to be responsible also for additional neurologic disorders in other  
319 mammalian species, possibly even including humans. Thus, future research should include the  
320 investigation of a possible zoonotic potential of RusV.

321

## 322 MATERIAL AND METHODS

### 323 Samples and data collection

324 Fresh-frozen or formalin-fixed paraffin-embedded (FFPE) brain and/or spinal cord samples from 29  
325 cats fulfilling the inclusion criteria for this study (lymphohistiocytic meningoencephalomyelitis,  
326 meningoencephalitis, encephalomyelitis or encephalitis of unknown cause, and clinical signs  
327 suggestive of 'staggering disease') were provided by different laboratories from Sweden, Austria,  
328 and Germany (**Table 1; Supplemental Tables S2, S3, and S4**). The samples dated back to 1991 to  
329 1993 (Austria) or 2017 to 2022 (Germany and Sweden). Some of these cases were published  
330 previously<sup>6, 8, 11</sup>. In addition, frozen brain samples from 21 cats originating from Sweden, Austria,  
331 and Germany without encephalitis were included as controls. An additional control group was  
332 composed of eight cats from Germany that had suffered from encephalitis of other types or causes,  
333 such as CNS manifestation of feline coronavirus (FCoV)-associated feline infectious peritonitis (FIP),  
334 vasculitic disorders and immune-mediated limbic encephalitis (**Table 1**)<sup>6</sup>. Metadata were provided  
335 by the submitters and/or extracted from the previous publications, including course and duration  
336 of disease, age, sex, origin, and outdoor access of the cats (**Supplemental Table S3**), as well as  
337 clinical signs (**Supplemental Table S4**).

338 Furthermore, the study includes archived frozen brain samples from yellow-necked field mice (*A.*  
339 *flavicollis*; n=10) and wood mice (*A. sylvaticus*; n=106) that had been collected near Grimsö, Örebro  
340 county, Sweden, as part of the Swedish Environmental Monitoring Program of Small Rodents at the  
341 Grimsö Wildlife Research Station<sup>43</sup>. Trapping was approved by the Swedish Environmental  
342 Protection Agency (latest permission: NV-412-4009-10) and the Animal Ethics Committee in Umeå  
343 (latest permissions: Dnr A 61-11), and all applicable institutional and national guidelines for the  
344 use of animals were followed. Species identities were confirmed by cytochrome b gene sequencing  
345 as described previously<sup>44</sup>.

346

### 347 RNA extraction

348 Fresh-frozen samples were mechanically disrupted in 1 ml TRIzol Reagent (Life Technologies,  
349 Darmstadt, Germany) by using the TissueLyser II (Qiagen, Hilden, Germany) according to the  
350 manufacturers' instructions. After the addition of 200 µl chloroform and a centrifugation step  
351 (14,000 × g, 10 min, 4 °C), the aqueous phase was collected and added to 250 µl isopropanol.  
352 Total RNA was extracted using the silica bead-based NucleoMagVet kit (Macherey & Nagel, Düren,  
353 Germany) with the KingFisher™ Flex Purification System (Thermo Fisher Scientific, Waltham, MA,  
354 USA) according to the manufacturers' instructions. *In vitro*-transcribed RNA of the enhanced green  
355 fluorescent protein (eGFP) gene was added during the extraction procedure as described by  
356 Hoffmann *et al.*<sup>45</sup>.

357 RNA extraction from FFPE tissue was performed with a combination of truXTRAC FFPE total NA Kit  
358 (Covaris, Brighton, UK) and the Agencourt RNAdvance Tissue Kit (Beckman Coulter, Krefeld,  
359 Germany). FFPE sections were loaded into a microTUBE-130 Screw-Cap (Covaris) together with  
360 110 µl Tissue Lysis Buffer and 10 µl proteinase K solution (both Covaris). The lysate was processed  
361 with a M220 Focused ultrasonicator (Covaris) according to the manufacturer's recommendations  
362 for acoustic pellet resuspension. The tube was subsequently incubated at 56 °C in a thermal shaker  
363 at 300 rpm overnight (no longer than 18 hours). Subsequently, the sample tube was cooled to room  
364 temperature and centrifuged at 5,000 × g for 15 min using a microTUBE-130 centrifuge adapter.  
365 A volume of 100 µl supernatant was transferred into a clean 1.5 ml reaction tube without  
366 transferring any wax or paraffin. After another centrifugation (5 min at 20,000 × g), 85 µl of the  
367 lower phase with the RNA-containing tissue pellet was transferred into a clean 1.5 ml reaction tube.  
368 It was incubated at 80 °C for 20 min and then cooled to room temperature, before 175 µl B1 buffer  
369 (Covaris) were added, mixed, and briefly centrifuged. Thereafter, 250 µl of 65% isopropanol were  
370 added, mixed, and briefly centrifuged. Subsequently, the preparations were further processed with  
371 the Agencourt RNAdvance Tissue Kit (Beckman Coulter) with the KingFisher™ Flex Purification  
372 System (Thermo Fisher Scientific) according to the manufacturer's instructions.

373

#### 374 **Metagenomic analysis and complete genome sequencing by high throughput sequencing (HTS)**

375 Total RNA was sequenced using a universal metagenomics sequencing workflow<sup>32</sup>. In brief, total  
376 RNA was extracted from fresh-frozen tissue samples using a cryoPREP impactor (Covaris) along  
377 with the Agencourt RNAdvance Tissue Kit (Beckman Coulter) and a KingFisher™ Flex Purification  
378 System (Thermo Fisher Scientific). Then, 350 ng RNA per sample were reverse-transcribed into  
379 cDNA using the SuperScript IV First-Strand cDNA Synthesis System (Thermo Fisher Scientific) and  
380 the NEBNext Ultra II Non-Directional RNA Second Strand Synthesis Module (New England Biolabs,  
381 Ipswich, MA, USA). Subsequently, cDNA was processed to generate barcoded sequencing libraries  
382 as described in detail elsewhere<sup>32</sup>. The cDNA was fragmented to 200 base pairs (bp) length (for  
383 FFPE material) or 500 bp length (for fresh-frozen material) using an M220 Focused ultrasonicator  
384 (Covaris). Subsequent library preparation was performed as described previously, with the following  
385 modification for FFPE material during size exclusion: small fragments were retained and purified  
386 twice with 1.2× Ampure XP Beads (Beckman Coulter). Libraries were quantified with the QIAseq  
387 Library Quant Assay Kit (Qiagen) and sequenced on an Ion Torrent S5XL instrument using Ion 530  
388 chips and chemistry for 400 bp reads, or Ion 540 chips and chemistry for 200 bp reads (Thermo  
389 Fisher Scientific) for fresh-frozen or FFPE material, respectively. In addition to the original  
390 sequencing libraries, 7 µl of the libraries were used to apply a capture enrichment with the panRubi  
391 v2 myBaits panel as described elsewhere<sup>34</sup>. For samples with expected major sequence divergence  
392 (>20%) from the initially available RusV sequences from Northern Germany that were used for  
393 designing the panRubi v2 myBaits panel, a hybridization temperature of 61 °C was used for 24-26

394 hours. In addition, a new panRubi myBaits panel was designed (v3) adding preliminary genome  
395 information from samples of Sweden and Austria to the v2 panel. The panRubi v3 myBaits panel  
396 consists of 19,982 baits (60-nt oligonucleotides arranged every 20 nt, 3x tiling; GC content of  
397 67.3%) and was collapsed at 98% sequence identity. This panel was applied with a hybridization  
398 temperature of 64 °C.

399 For selected RusV-positive samples, we additionally applied a depletion protocol in order to  
400 decrease the amount of host-derived ribosomal RNA (rRNA) within the total RNA and thereby  
401 increase the virus-to-background ratio. In detail, we used a Pan-Mammal riboPOOL reaction kit  
402 (siTOOLs Biotech, Planegg, Germany) for 0.2 and 1 µg total RNA following the manufacturer's  
403 instructions. The rRNA-depleted RNA was then used for strand-specific library preparation with the  
404 Collibri Stranded RNA Library Prep Kit (Thermo Fisher Scientific). The libraries were checked for  
405 sufficient quality and quantity using the 4150 TapeStation System (Agilent Technologies, Santa  
406 Clara, CA, USA) with the High Sensitivity D1000 ScreenTape and reagents (Agilent Technologies) as  
407 well as a Qubit Fluorometer (Thermo Fisher Scientific) along with the dsDNA HS Assay Kit (Thermo  
408 Fisher Scientific). Pooled libraries were sequenced using a NovaSeq 6000 (Illumina, San Diego, CA,  
409 USA) running in 100 bp mode.

410

#### 411 ***De novo* assembly and sequence annotation of HTS-derived sequences**

412 The raw sequences from Ion Torrent and Illumina systems were processed as described  
413 previously<sup>34</sup>. Briefly, the platform-specific adapters were initially removed from the reads and the  
414 sequences were trimmed according to their quality using either 454 Sequencing Systems Software  
415 (version 3.0) or Trim Galore (version 0.6.6)<sup>46</sup> with automated adapter selection, for Ion Torrent and  
416 Illumina reads, respectively. Subsequently, the reads were filtered according to their average G+C  
417 content using PRINSEQ-lite (version 0.20.4)<sup>47</sup> with a G+C threshold of ≥60 mol%. The trimmed and  
418 filtered reads were used for *de novo* assembly using SPAdes genome assembler (version 3.15.2)<sup>48</sup>  
419 running in single cell mode (--sc) and Ion Torrent mode (--iontorrent) as required. Subsequently, all  
420 contigs were mapped back to an appropriate RusV reference sequence using Geneious generic  
421 mapper with medium sensitivity (Geneious Prime 2021.0.1; Biomatters, Auckland, New Zealand),  
422 and a consensus sequence was generated. The final sequence was annotated according to an  
423 appropriate RusV reference genome using ORF detection as provided by Geneious Prime 2021.0.1.

424

#### 425 **Bornavirus and RusV RT-qPCRs and design of adapted broad range RusV-specific primers and** 426 **probes**

427 Two RT-qPCR assays were applied for the detection of either a broad range of orthobornaviruses  
428 (panBorna v7.2; **Supplemental Table S1**) or specifically BoDV-1 (BoDV-1 Mix-1; **Supplemental Table**

429 **S1)** following previously published procedures<sup>27, 38</sup>. Initial screening for RusV-specific RNA was  
430 performed using a TaqMan-based RT-qPCR assay (RusV Mix-1; **Supplemental Table S1**) targeting  
431 the initially discovered RusV sequences from a zoo in Northern Germany as described by Bennett  
432 *et al.*<sup>30</sup>. The exogenously supplemented eGFP RNA was amplified as RNA extraction control as  
433 described previously<sup>45</sup>.

434 To establish a new RT-qPCR assay for the detection of a broader range of RusV sequences, all  
435 available sequences from Northern Germany and Sweden were aligned and a set of primers and  
436 probe (panRusV-2; **Supplemental Table S1; Supplemental Figure S3**) was designed to target a  
437 highly conserved region at the 5' terminus of the genome. RT-qPCR was performed with AgPath-ID  
438 One-Step RT-PCR reagents (Thermo Fisher Scientific), panRusV-2 primers (final concentration:  
439 0.8  $\mu$ M each) and probe (0.4  $\mu$ M), eGFP primers (0.2  $\mu$ M) and probe (0.15  $\mu$ M), and 2.5  $\mu$ l extracted  
440 RNA in a total volume of 12.5  $\mu$ l. The reaction was performed with the following cycler setup: 45 °C  
441 for 10 min, 95 °C for 10 min, 45 cycles of 95 °C for 15 sec, 60 °C for 30 sec and 72 °C for 30 sec.  
442 A standard preparation of a RusV-positive donkey brain<sup>30</sup> served as positive control and was used  
443 for the calibration of Cq values in each RT-qPCR analysis.

444

#### 445 **Determination of partial p150-encoding RusV sequences by Sanger sequencing**

446 Highly conserved primer binding sites in the same alignment as described above were also  
447 identified for the amplification of 449 nt at the 5' end of the p150-encoding sequence by  
448 conventional RT-PCR (**Supplemental Table S1; Supplemental Figure S3**). RNA extracted from frozen  
449 brain samples from all cats and rodents with positive panRusV RT-qPCR results was analysed using  
450 the following One-Step RT-PCR conditions: 2.5  $\mu$ l RNA were amplified in a total volume of 25  $\mu$ l  
451 using the SuperScript III One-Step RT-PCR system with Platinum Taq DNA polymerase (Thermo  
452 Fisher Scientific) and 0.4  $\mu$ M each of primers RusV\_80+ and RusV\_528- (**Supplemental Table S1;**  
453 **Supplemental Figure S3**). The cycler setup consisted of 50 °C for 30 min, 94 °C for 2 min, followed  
454 by 40 cycles of 94 °C for 30 sec, 63 °C for 30 sec, and 68 °C for 25 sec, and a final elongation step  
455 at 68 °C for 5 min. Following separation and visualization by gel electrophoresis, amplification  
456 products were purified using Zymoclean Gel DNA Recovery Kit (Zymo Research, Freiburg, Germany)  
457 and Sanger sequencing service was provided by Microsynth Seqlab (Balgach, Switzerland).  
458 Amplicons were sequenced in both directions and consensus sequences of 409 bp lengths were  
459 generated after *de novo* assembly of quality- and primer-trimmed raw sequences in Geneious Prime  
460 2021.0.1.

461

## 462 **Phylogeny and geographic mappings**

463 Phylogenetic analysis of RusV sequences generated in this study was performed together with  
464 representative sequences of all currently known matonaviruses<sup>30, 49</sup>, as well as all publicly available  
465 RusV sequences from the INSDC database<sup>30, 34</sup>. For the phylogeny within the known matonaviruses,  
466 the aa sequences of the sPP were aligned using MUSCLE (version 3.8.425)<sup>50</sup> with a maximum of  
467 100 iterations. A maximum likelihood (ML) phylogenetic tree was then calculated using IQ-TREE2  
468 (version 2.2.0)<sup>51</sup> running in automatic model selection mode (FLU+F+I+G4) and applying 100,000  
469 ultra-fast bootstrap replicates<sup>52</sup>. For phylogenetic analysis of RusV nt sequences, the complete or  
470 nearly complete RusV sequences were aligned using MAFFT (version 7.450)<sup>53</sup>. A ML tree was then  
471 calculated as described above (model: TIM3+F+I). The alignment was further used for sequence  
472 comparison with a sliding window approach that calculated the pairwise distances (Jukes Cantor  
473 1969 model) within a window of 200 nt every 50 nt. A phylogenetic tree of partial p150 protein-  
474 coding sequences of 409 nt length was built as described above (model: TN+F+G4).

475

## 476 **Histopathological examination**

477 Brain and spinal cord samples of cats were harvested on *post mortem* examination via extensive  
478 craniectomy-laminectomy. For histology, brain and spinal cord tissues from cats as well as brain  
479 tissue from all eight RusV-positive wood mice were fixed in 10% neutral-buffered formalin. Fixed  
480 neural tissues were routinely sampled, processed in an automatic tissue processor, embedded in  
481 paraffin wax, sectioned at 2–4 µm, and stained with histological standard stains including  
482 haematoxylin-eosin (H.E.), Nissl and Luxol-Fast-blue stains.

483 Slices were microscopically examined for the presence of non-suppurative, lymphohistiocytic  
484 encephalitis, meningoencephalitis and/or meningoencephalomyelitis. Inflammation was graded  
485 mild to severe based on the extent of inflammatory cell infiltrates. Mild encephalitis comprised few  
486 perivascular infiltrates, most of which showed one to two layers of cells and were not necessarily  
487 present in all investigated locations. One or two larger infiltrates in a single location were allowed  
488 to occur in this category. Moderate encephalitis comprised several infiltrates per location, showing  
489 three to five layers of cells, allowing single locations with larger or smaller infiltrates. Severe  
490 encephalitis comprised many perivascular infiltrates, most of which showed several layers of cells  
491 (>5) in the majority of investigated locations.

492

## 493 **Detection of RusV-specific RNA by *in-situ* hybridization (ISH)**

494 A custom-designed RNAscope probe was provided by Advanced Cell Diagnostics (Newark, NJ, USA)  
495 based on the consensus sequence of the available RusV sequences from Sweden, targeting the  
496 highly conserved region at the 5' end of the RusV genome. A probe targeting the messenger RNA



497 (mRNA) of the ubiquitous, widely expressed housekeeping gene peptidyl-prolyl-isomerase-B (*Felis*  
498 *catus*-PPIB; cat. no. 455011) was used as positive control, while a probe targeting bacterial  
499 dihydropicolinate reductase (DapB; cat. no. 310043) was used as a negative control probe. Viral  
500 nucleic acid was determined using ISH with the RNAscope® 2.5 High Definition RED assay  
501 (Advanced Cell Diagnostics, Hayward, CA, USA) according to the manufacturer's instructions.  
502 Briefly, brain slides were deparaffinized and pre-treated with 1× Target Retrieval solution and  
503 RNAscope® Protease Plus solution prior to hybridization with the target probe. Subsequently, the  
504 tissue was treated with a series of pre-amplifiers and amplifiers followed by the application of a  
505 chromogenic substrate. The samples were counterstained with Hematoxylin Gill No. 2 (Merck,  
506 Darmstadt, Germany).

507 Brain sections of a RusV-positive capybara<sup>30</sup> served as positive control and showed positive  
508 reactivity with the specific RusV RNAscope probe. A brain sample from a RusV-negative control cat  
509 incubated with the RusV RNAscope probe and a brain sample from a RusV-positive cat incubated  
510 with an irrelevant RNAscope probe (*Mycoplasma hyopneumoniae*) served as negative controls and  
511 yielded no reactivity (data not shown). The scoring of the signals was performed as described in  
512 **Supplemental Table S5**.

513

#### 514 **Detection of RusV and BoDV-1 antigen by immunohistochemistry (IHC) staining**

515 Brain slides were evaluated for expression of RusV capsid protein using a mouse monoclonal  
516 primary antibody (2H11B1; see below). The slides were deparaffinised and underwent antigen  
517 retrieval in the microwave (750 W, 20 min) being immersed in 10 mM citrate buffer (pH 6.0) before  
518 incubation with the primary antibody (dilution 1:100) at 4 °C for 18 hours. Successful labelling was  
519 demonstrated using ImmPRESS® polymer anti-mouse IgG (LINARIS Biologische Produkte,  
520 Dossenheim, Germany) coupled to peroxidase and a diaminobenzidine tetrahydrochloride staining  
521 kit (ImmPACT DAB substrate HRP; BIOZOL Diagnostica, Eching, Germany) according to the  
522 manufacturers' instructions. After peroxidase reaction, sections were counterstained with  
523 hematoxylin. Sections of a RusV-positive capybara brain<sup>30</sup> served as virus-positive tissue control,  
524 whereas brain sections of cats from the control groups that had been tested negative for RusV by  
525 RT-qPCR served as negative tissue control (**Supplemental Figure S8**). Specificity of the anti-mouse  
526 IgG polymere was evaluated by two sections each of capybara brain and of PCR-confirmed RusV  
527 positive cat SWE\_07, in which 2H11B1 antibody was replaced by horse serum and by anti-FCoV  
528 mouse monoclonal (FIPV 3-70, LINARIS Biologische Produkte, Dossenheim, Germany;  
529 **Supplemental Figure S8**). The scoring of the signals was performed as described in **Supplemental**  
530 **Table S5**.

531 Cat brain slides were furthermore assessed for the expression of BoDV-1 nucleoprotein using  
532 murine monoclonal antibody Bo18<sup>54</sup> with the ABC detection kit (biotinylated goat anti-mouse IgG;

533 BIOZOL Diagnostica) and diaminobenzidine tetrahydrochloride (ImmPACT DAB substrate HRP;  
534 BIOZOL Diagnostica). Brain slides of a horse confirmed as BoDV-1-infected by RT-qPCR served as  
535 positive control. Replacement of Bo18 antibody by an irrelevant mouse monoclonal antibody (FIPV  
536 3-70) was used as negative reagent control on BoDV-1-positive horse tissue and RusV-positive  
537 feline brain SWE\_07.

538

### 539 **Recombinant protein production and generation of a monoclonal anti-RusV capsid protein antibody**

540 A synthetic DNA string fragment encoding aa 128 to 308 of the RusV capsid protein, based on the  
541 sequence from an infected donkey from Northern Germany (accession number MN552442.2), was  
542 ordered from GeneArt synthesis (Thermo Fisher Scientific) and inserted into the pEXPR103  
543 expression vector (IBA Lifesciences, Göttingen, Germany) in-frame with a Strep-tag-coding  
544 sequence at the 3' end. The protein with a C-terminal Strep-tag was expressed in Expi293 cells  
545 (Thermo Fisher Scientific) and subsequently purified using Strep-Tactin XT Superflow high capacity  
546 resin (IBA Lifesciences) following the manufacturer's instructions.

547 For monoclonal antibody generation, two female BALB/c mice were immunized intraperitoneally  
548 with 20 µg of purified capsid protein in compliance with the national and European legislation, with  
549 approval by the competent authority of the Federal State of Mecklenburg-Western Pomerania,  
550 Germany (reference number: 7221.3-2-042/17). The immunization, as well as the generation of  
551 hybridoma cells were performed as described previously<sup>55</sup>.

552

## 553 **ACKNOWLEDGEMENTS**

554 The authors like to thank Arnt Ebinger, Jessica Geers, Viola Haring, Weda Hoffmann, Jenny Lorke,  
555 Ole Frithjof Pietsch, Patrick Slowikowski, Kathrin Steffen, Patrick Zitzow (all Greifswald– Insel  
556 Riems, Germany), Lisa Pichl, Sandra Aumiller (both Munich), Albin Norman and Vidar Skullerud  
557 (both Uppsala, Sweden) for their excellent technical assistance, Carola Wolf (Rostock, Germany),  
558 Josef Zoher (Deutsch-Wagram, Austria), Jonas Johansson Wensman and Ann-Catrin Hagblom (both  
559 Uppsala, Sweden) for sample submission, and Angele Breithaupt (Greifswald – Insel Riems,  
560 Germany) for providing advice and positive controls for *in-situ* hybridization and  
561 immunohistochemistry.

562 Part of the work was funded by the German Federal Ministry of Education and Research (BMBF),  
563 project RubiZoo (grant no. 01KI2111), donated to D.R. The work of C.W. was supported by the  
564 German Federal Ministry of Food and Agriculture through the Federal Office for Agriculture and Food  
565 (BMEL), project ZooSeq, (grant no. 2819114019). The contribution by F.E. and B.H. was funded by  
566 the Swedish Environmental Protection Agency through the Swedish Wildlife Management Fund  
567 (grant no. 2020-00093).

568

## 569 **DATA AVAILABILITY**

570 The novel RusV sequences have been made publicly available in the INSDC database under the  
571 accession numbers ON641041 to ON641071.

572

## 573 **AUTHOR CONTRIBUTIONS**

574 K.M., M.B., C.L., and D.R. initiated the study. K.M., H.W., S.T., and C.L. evaluated the histopathology.  
575 F.P., C.W., and B.L. performed metagenomics sequencing. J.K., P.S., P.We. and D.R. established  
576 and performed PCR assays and Sanger sequencing. F.P. and D.R. performed phylogenetic analyses.  
577 H.W., C.W.L., and J.M. established and performed RNAscope *in-situ* hybridization. K.M. and M.R.  
578 established and performed immunohistochemistry. A.A. and S.R. generated the RusV-specific  
579 monoclonal antibody. K.M., H.W., S.T., F.E., S.N., J.N., P.Wo., L.M., C.B., K.M.O., C.R., T.F., B.H., and  
580 C.L. provided samples from cats or rodents together with clinical and pathological diagnosis and  
581 metadata. K.M., F.P., H.W., C.W., and C.L. wrote parts of the manuscript. D.H., R.G.U, N.N., and M.B.  
582 supervised parts of the study. D.R. conceptualized the study and wrote and finalized the  
583 manuscript. The manuscript was critically reviewed through the contributions of all authors.

584

585 **COMPETING INTERESTS STATEMENT**

586 The authors declare to have no competing interests.

587

588 FIGURES

589

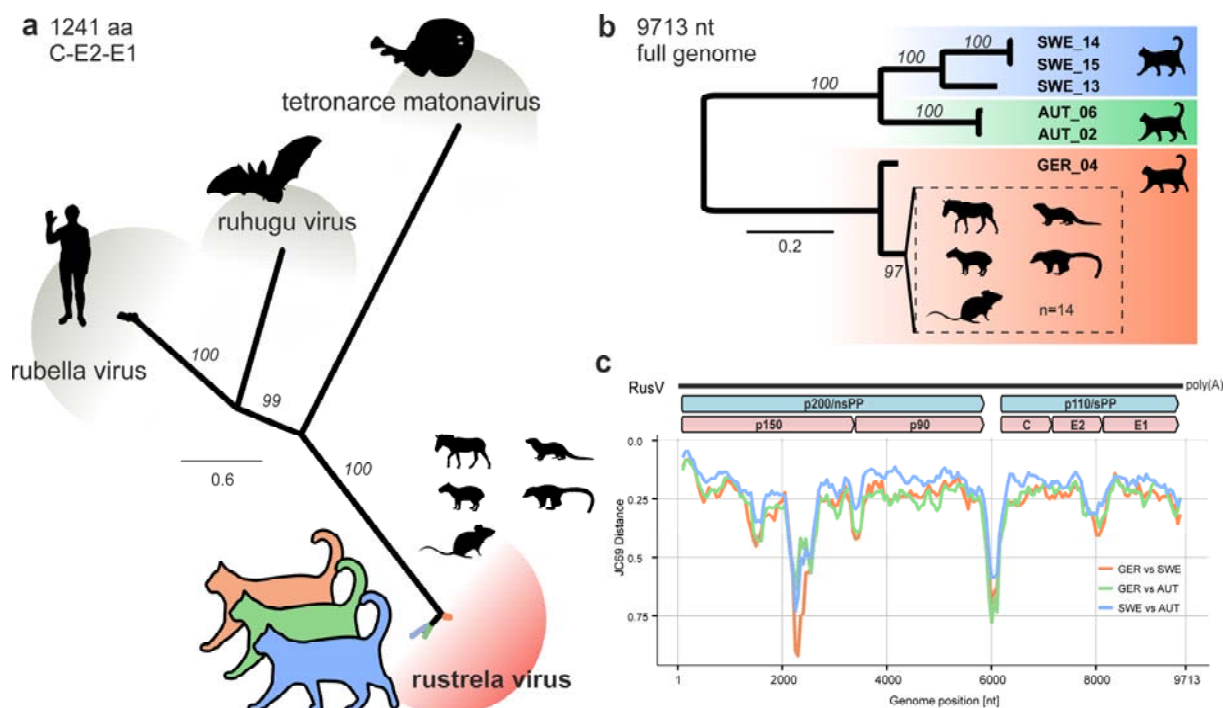

590

591 **Figure 1. Sequence comparison of complete rustrela virus (RusV) genome sequences from cats**  
 592 **from Sweden, Austria, and Germany. (a)** The amino acid sequences of the structural polyprotein  
 593 (p110/sPP) of all known matonaviruses were aligned and a maximum-likelihood (ML) phylogenetic  
 594 tree was calculated (IQ-TREE2 version 2.2.0; FLU+F+I+G4; 100,000 ultrafast bootstraps).  
 595 Bootstrap support values are shown in italics. **(b)** ML tree of complete or nearly complete RusV  
 596 genome sequences from cats with 'staggering disease' and all publicly available RusV sequences  
 597 (IQ-TREE2 version 2.2.0; TIM3+F+I; 100,000 ultrafast bootstraps). Sequences from Sweden,  
 598 Austria, and Germany are highlighted in blue, green, and orange, respectively. Sequences from a  
 599 previously identified German RusV cluster from zoo animals with encephalitis and apparently  
 600 healthy yellow-necked field mice (*Apodemus flavicollis*)<sup>30, 31, 34</sup> are presented in a dashed box.  
 601 Bootstrap support values are shown at the nodes. **(c)** The genetic variability of RusV lineages from  
 602 Sweden, Austria, and Germany is presented as mean pairwise JC69 distance using a sliding window  
 603 analysis (window: 200 nt; step size: 50 nt). The genomic organization of RusV is shown, highlighting  
 604 the non-structural (p200/nsPP) and structural (p110/sPP) polyprotein open reading frames, as well  
 605 as the mature cleavage products protease (p150), RNA-directed RNA polymerase (p90), capsid  
 606 protein (C), and glycoproteins E2 and E1.

607

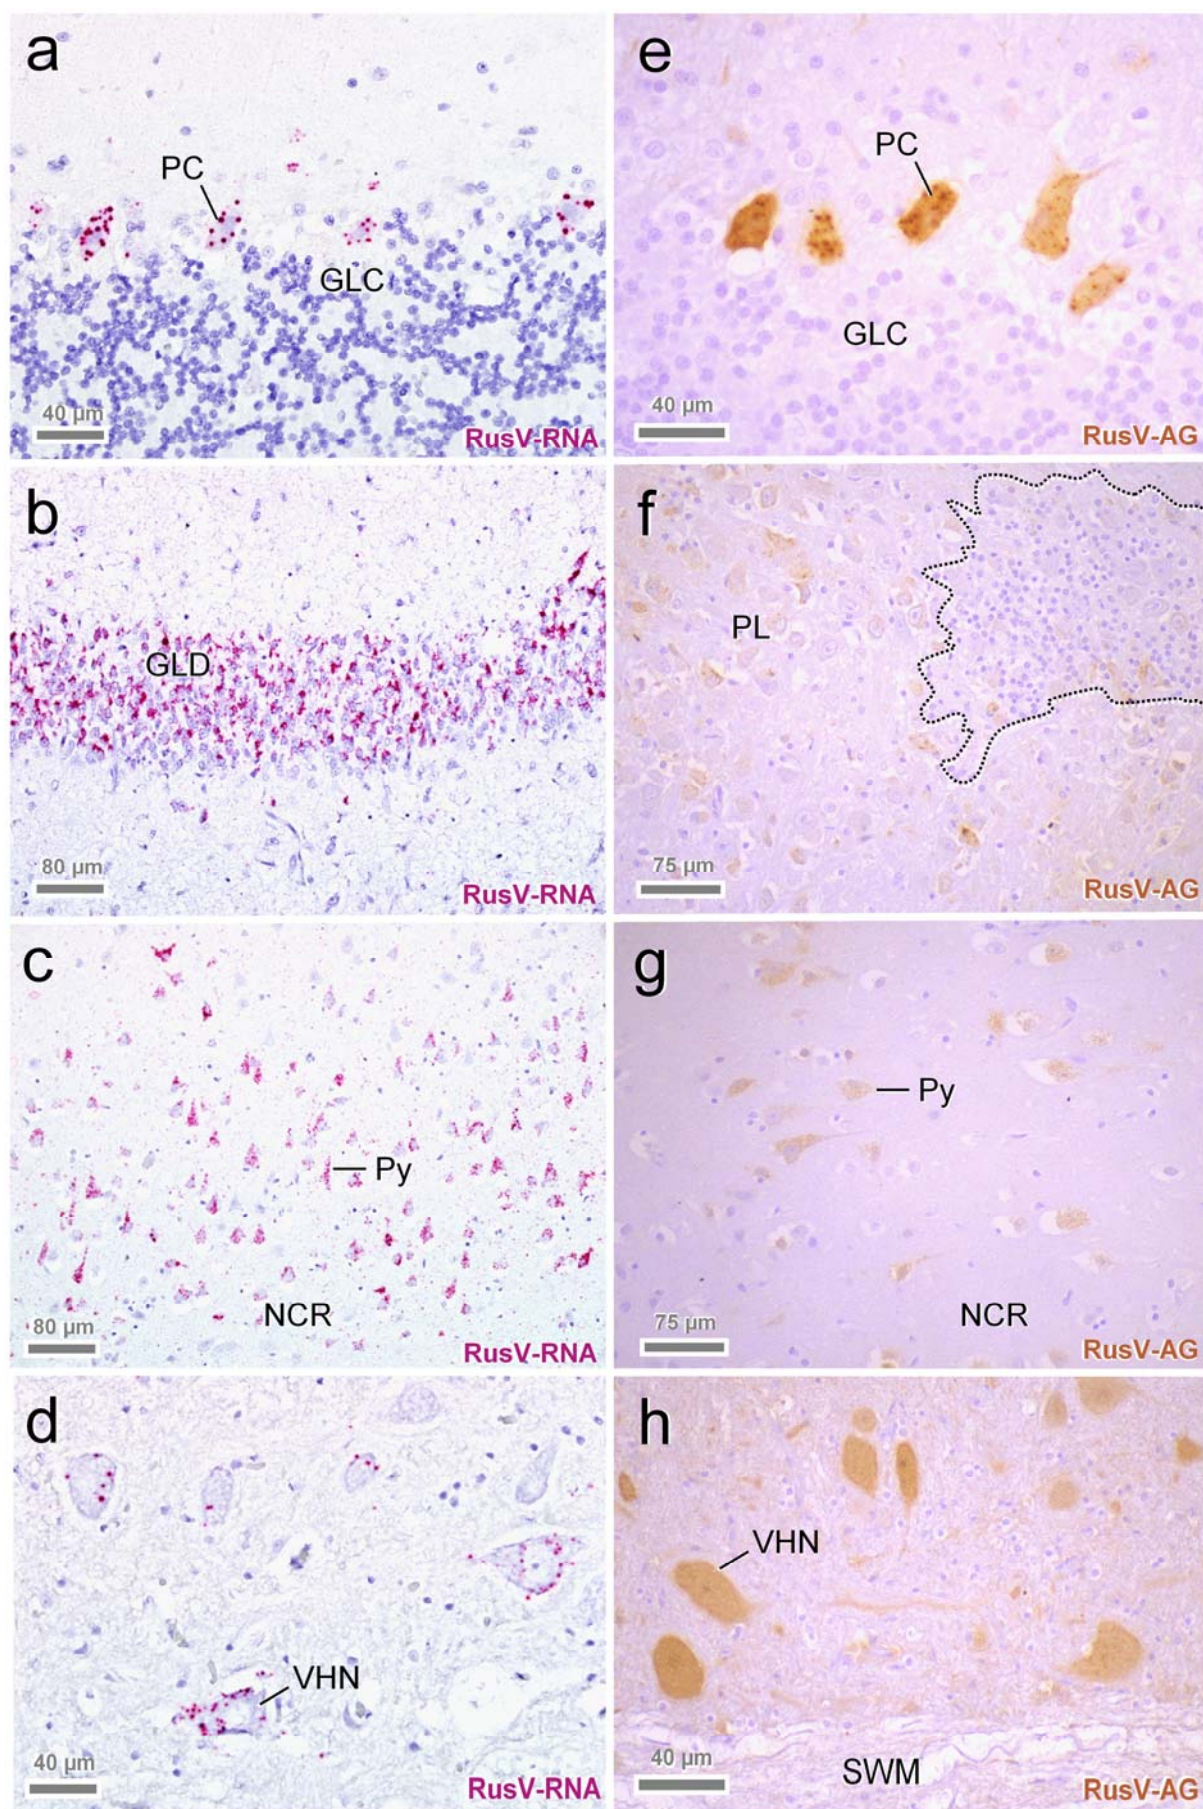

609 **Figure 2. Detection of rustrela virus (RusV) RNA by RNAscope *in-situ* hybridization (a-d) and RusV**  
610 **antigen by immunohistochemistry (e-h) in the central nervous system of encephalitic cats.** Both  
611 virus RNA and capsid protein were located mainly in the cytoplasm of different nerve cell  
612 populations. Typical are spherical reaction products, which may coalesce to more extensive and/or  
613 diffuse staining. Neurons with the highest viral load were particularly Purkinje cells (**a, e: PC**),  
614 granule cells of dentate gyrus (**b: GLD**), pyramidal cells within hippocampal pyramidal cell layer (**f:**  
615 **PL**), and neocortex (**c, g: Py**). Also, numerous RusV positive cells are seen in lower brainstem and  
616 spinal ventral horn neurons (**d, h: VHN**). Note that expression of virus RNA and antigen is far more  
617 widespread than inflammatory changes (**f: dashed line**) and mostly affects neurons without  
618 cytopathic effects.

619 GLC: granule cell layer of cerebellar cortex; GLD: granule cell layer of dentate gyrus; NCR:  
620 neocortical ribbon; PC: Purkinje cell; PL: pyramidal cell layer; Py: pyramidal cell; SWM: spinal white  
621 matter; VHN: ventral horn neuron. Sources: (**a**) cat SWE\_03; (**b**) SWE\_11; (**c**) SWE\_05; (**d, f**) AUT\_09;  
622 (**e**) AUT\_04; (**g**) SWE\_08; (**h**) AUT\_08.

623

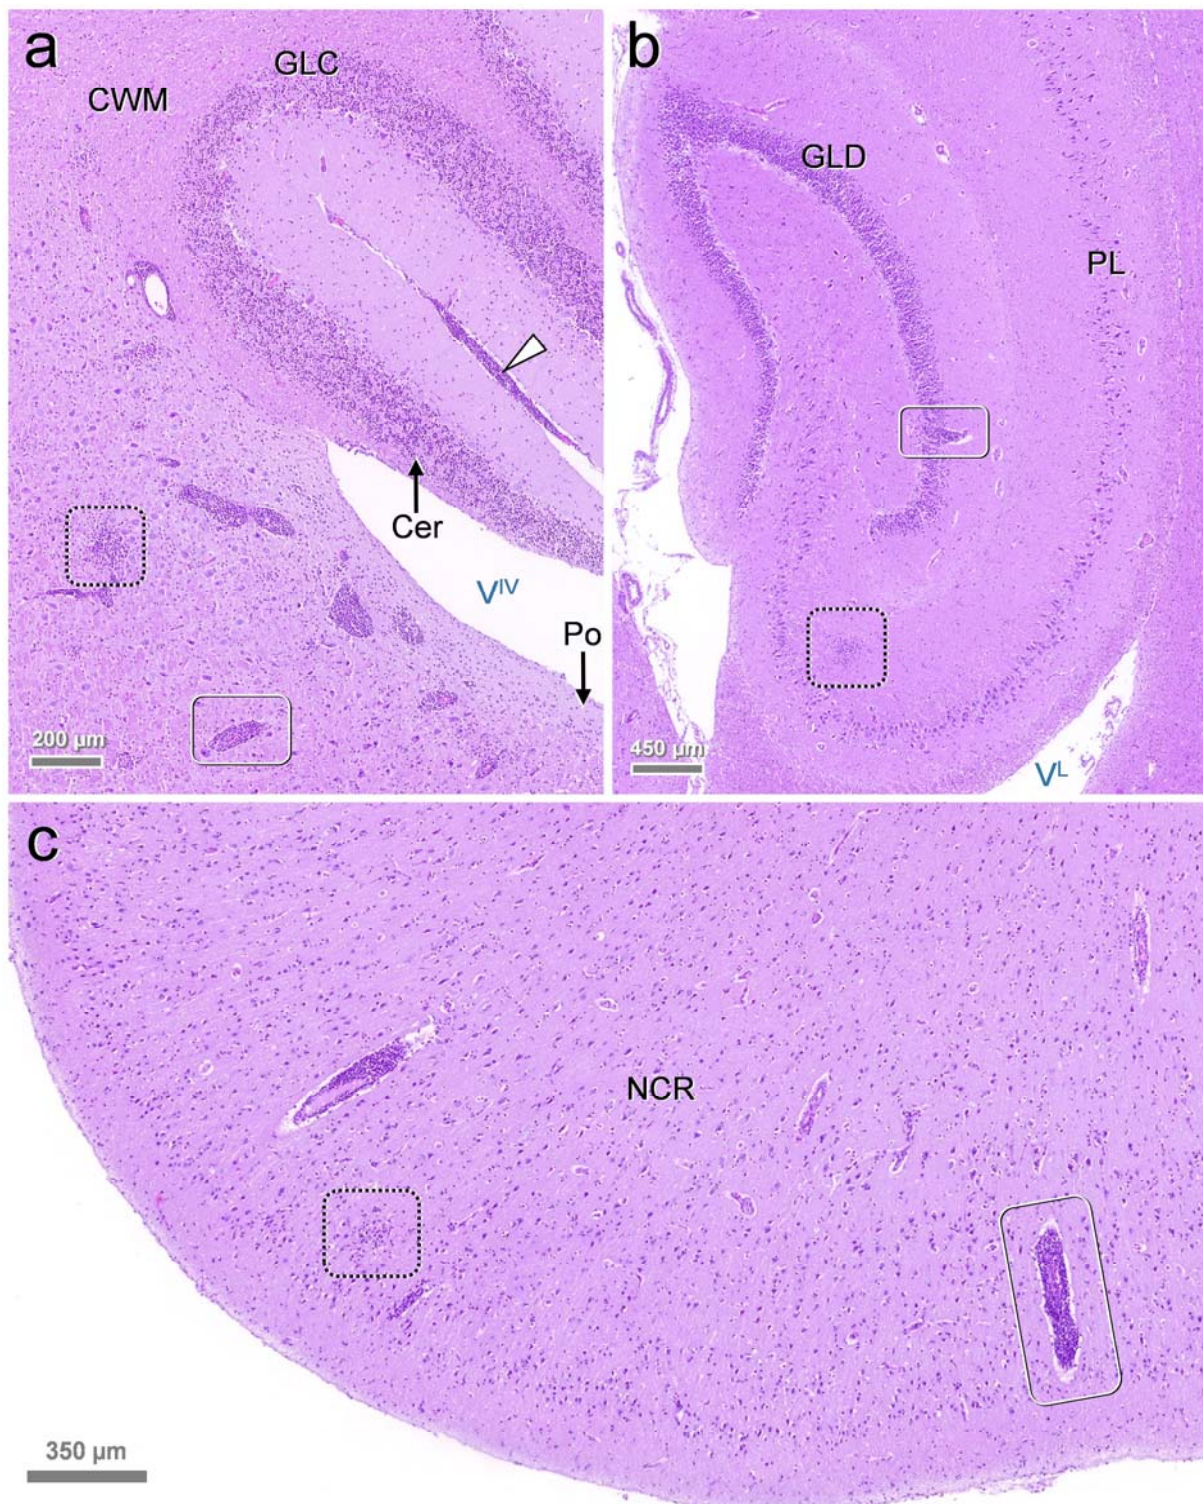

624

625 **Figure 3. Encephalitic pattern in rustrela virus (RusV)-infected cats.** Histology typically features  
626 polio-predominant, perivascular lymphohistiocytic cuffs (**a-c**: solid boxes) and angiocentric  
627 infiltrates (**a-c**: dashed boxes). They are most prominent in brainstem (**a**: Po), hippocampus  
628 formation (**b**) and neocortex (**c**). Leptomeningeal infiltrates (**a**: white arrowhead) also occur in areas  
629 with sparse parenchymal invasion such as the cerebellum (**a**: Cer).

630 Stain: hematoxylin eosin (H.E.). Anatomical landmarks: Cer: cerebellum; CWM: cerebellar white  
631 matter; GLC: granule cell layer of cerebellar cortex; GLD: granule cell layer of dentate gyrus; NCR:



632 neocortical ribbon; PL: pyramidal cell layer; Po: pons; V<sup>IV</sup>: fourth ventricle; V<sup>L</sup>: lateral ventricle.  
633 Sources: (a) cat SWE\_04; (b, c) SWE\_07.

634  
635  
636  
637  
638

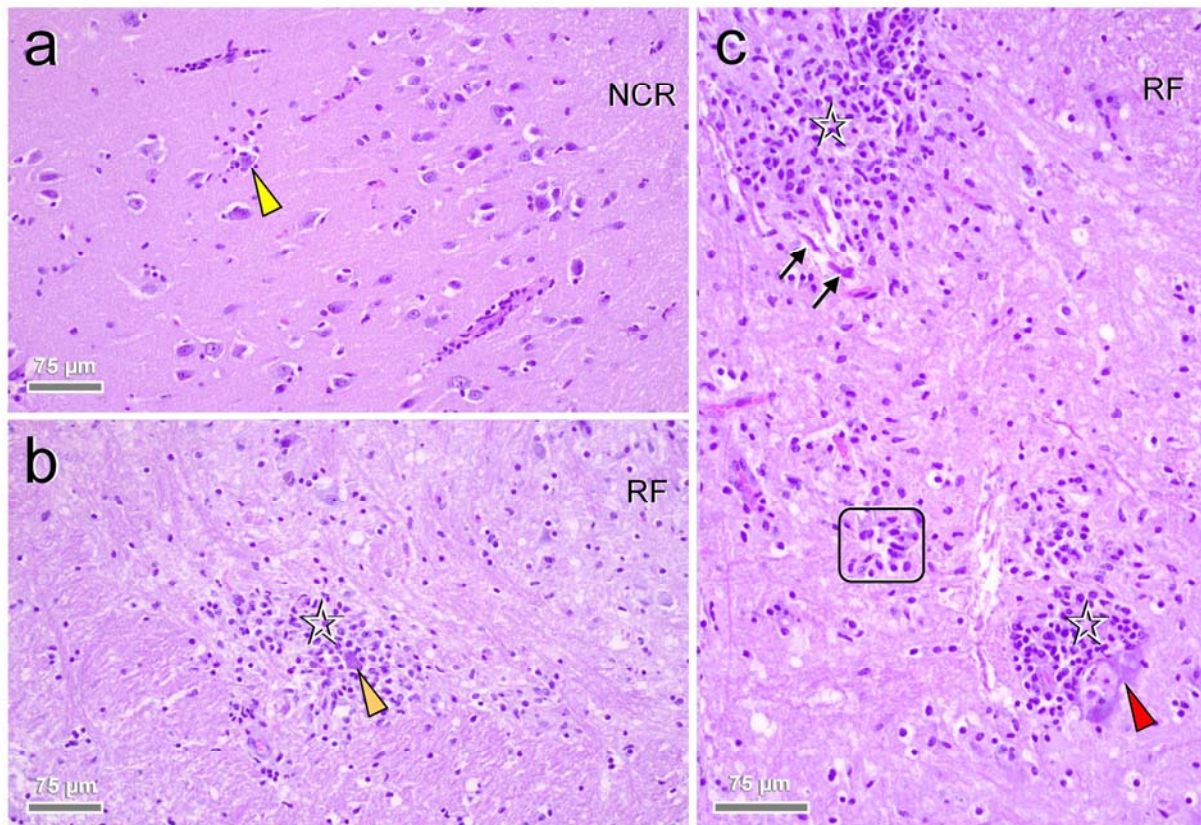

639  
640 **Figure 4. Close-up pathology and cellular damage of rustrela virus (RusV) infection within the brain.**  
641 Infected brains show neurons (a-c: arrowheads) with (c: red arrowhead) and without (a, b: yellow  
642 and orange arrowheads) degenerative features, early (a, b: yellow and orange arrowheads) and  
643 advanced (c: red arrowhead) neuronophagia suggestive of a neuronotropic pathogen. Focal  
644 dropout of neurons goes with formation of microglial stars (c: frame). Inflammatory infiltrates (b, c:  
645 asterisks) mingle with focal glial proliferates. Dystrophic axons (c: black arrows) are occasionally  
646 present within the perilesional area.

647 Stain: hematoxylin eosin (H.E.). Anatomical landmarks: NCR: neocortical ribbon; RF: reticular  
648 formation. Sources: (a) cat SWE\_06; (b, c) SWE\_04.

649

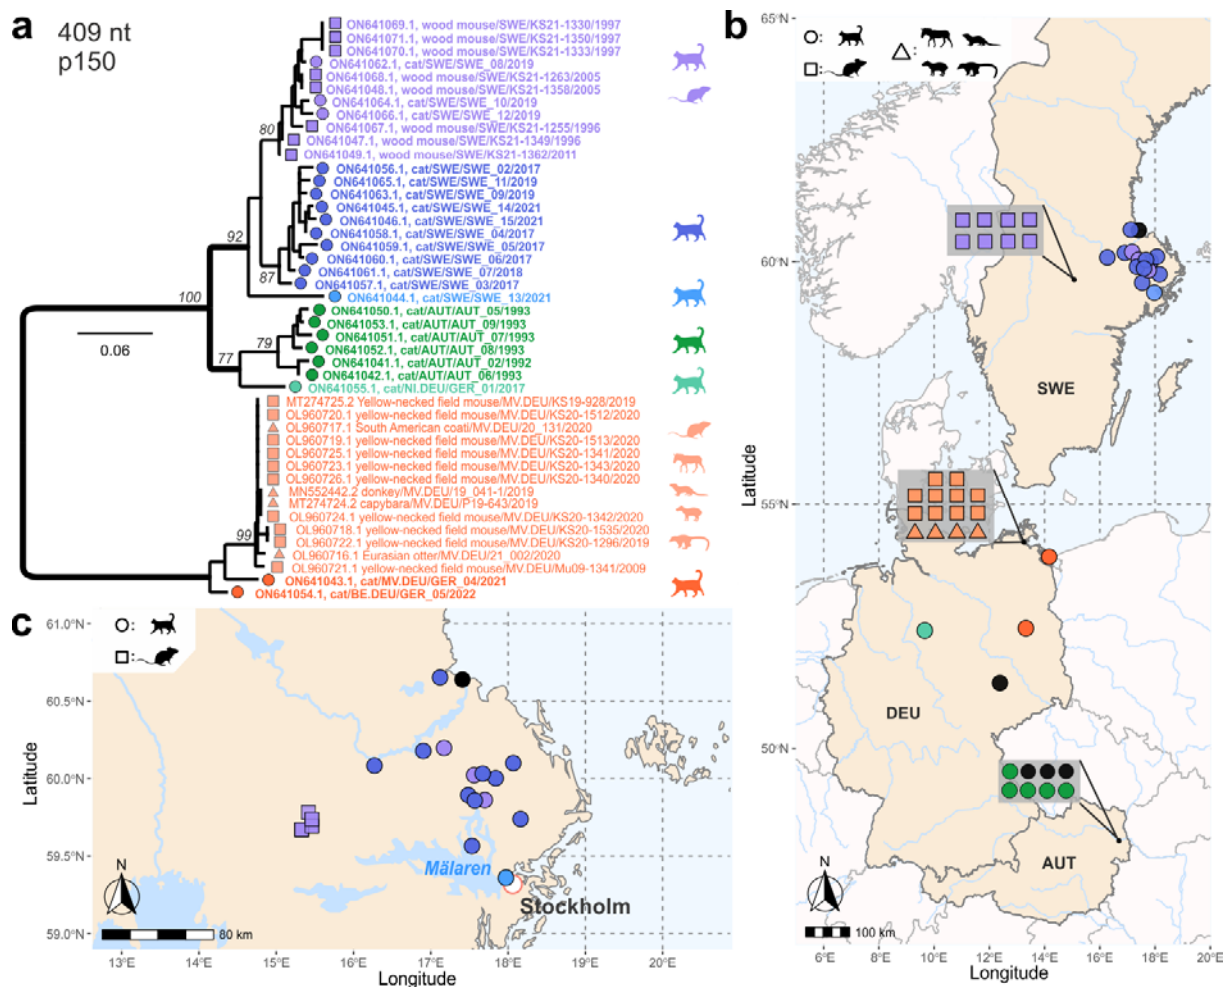

650

651 **Figure 5. Phylogenetic analysis and spatial distribution of rustrela virus (RusV) infections in Europe.**

652 (a) Maximum likelihood (ML) phylogenetic tree of partial RusV sequences (409 nucleotides,

653 representing genome positions 100 to 508 of donkey-derived RusV reference genome

654 MN52442.2; IQ-TREE version 2.2.0; TN+F+G4; 100,000 ultrafast bootstraps). Only bootstrap

655 values  $\geq 70$  at major branches are shown in the phylogenetic tree. RusV sequence names are shown

656 in the format “host/ISO 1366 code of location (federal state.country)/animal ID/year”. (b, c)

657 Mapping of the geographic origin of RusV-positive animals in Europe (b) and in the Lake Mälaren

658 region in Sweden (c). Colours represent the phylogenetic clades of the sequences (a). RusV-positive

659 cats that failed to deliver sequences are depicted in black. The respective host animals are shown

660 as circles (cats), squares (*Apodemus* spp.), and triangles (zoo animals). Symbols in grey boxes

661 represent individuals from the same or very close locations.

662 AUT = Austria, DEU/GER = Germany, SWE = Sweden; BE = Berlin, MV = Mecklenburg-Western

663 Pomerania, NI = Lower Saxony.

664

665 **TABLES**

666

667 **Table 1. Rustrela virus (RusV) detection in brain samples from cats with or without signs of**  
 668 **'staggering disease'.**

| Group<br>Country                                   | Years     | n  | RusV detection (positive / total animals) |         |       |       |                    |
|----------------------------------------------------|-----------|----|-------------------------------------------|---------|-------|-------|--------------------|
|                                                    |           |    | HTS                                       | RT-qPCR | ISH   | IHC   | total <sup>a</sup> |
| Cats matching the criteria of 'staggering disease' |           |    |                                           |         |       |       |                    |
| Sweden                                             | 2017-2021 | 15 | 9/9                                       | 15/15   | 14/14 | 15/15 | 15/15              |
| Austria                                            | 1991-1993 | 9  | 3/4                                       | 8/9     | 7/9   | 8/9   | 9/9                |
| Germany                                            | 2017-2022 | 5  | 2/2                                       | 3/5     | 1/3   | 4/5   | 4/5                |
| Cats with other types of encephalitis              |           |    |                                           |         |       |       |                    |
| Germany                                            | 2017-2020 | 8  | 0/3                                       | 0/8     | n.d.  | 0/8   | 0/8                |
| Cats without encephalitis                          |           |    |                                           |         |       |       |                    |
| Sweden                                             | 2021-2022 | 7  | n.d.                                      | 0/7     | n.d.  | 0/1   | 0/7                |
| Austria                                            | 2021      | 5  | n.d.                                      | 0/5     | n.d.  | n.d.  | 0/5                |
| Germany                                            | 2018-2020 | 9  | n.d.                                      | 0/9     | n.d.  | 0/9   | 0/9                |

669 HTS: high throughput sequencing followed by metagenomic analysis; ISH: *in-situ* hybridization using  
 670 RNAscope; IHC: immunohistochemistry; n.d.: not determined

671 a Cats were considered RusV-positive if RusV RNA or antigen was detected by at least one of the  
 672 applied methods.

673

674 REFERENCES

- 675 1. Kumar R. Understanding and managing acute encephalitis. *F1000Res* **9**, 60 (2020).  
676
- 677 2. Kelly DF, Wells GA, Haritani M, Higgins RJ, Jeffrey M. Neuropathological findings in cats with  
678 clinically suspect but histologically unconfirmed feline spongiform encephalopathy. *Vet Rec*  
679 **156**, 472-477 (2005).
- 680
- 681 3. Schwab S, *et al.* Non-suppurative meningoencephalitis of unknown origin in cats and dogs: an  
682 immunohistochemical study. *J Comp Pathol* **136**, 96-110 (2007).
- 683
- 684 4. Künzel F, Rebel-Bauder B, Kassl C, Leschnik M, Url A. Meningoencephalitis in cats in Austria: a  
685 study of infectious causes, including *Encephalitozoon cuniculi*. *J Feline Med Surg* **19**, 171-176  
686 (2017).
- 687
- 688 5. Zuraw A, Plog S, Lierz M, Gruber AD. No evidence of *Sarcocystis calchasi* involvement in  
689 mammalian meningoencephalitis of unknown origin. *Vet Parasitol Reg Stud Reports* **3-4**, 49-  
690 52 (2016).
- 691
- 692 6. Nessler J, *et al.* Meningoencephalomyelitis of unknown origin in cats: A case series describing  
693 clinical and pathological findings. *Front Vet Sci* **7**, 291 (2020).
- 694
- 695 7. Kronevi T, Nordström M, Moreno W, Nilsson PO. Feline ataxia due to nonsuppurative  
696 meningoencephalomyelitis of unknown aetiology. *Nord Vet Med* **26**, 720-725 (1973).
- 697
- 698 8. Weissenböck H, Nowotny N, Zoher J. Feline Meningoencephalomyelitis ("Staggering Disease")  
699 in Österreich. *Wien Tierärztl Mschr* **81**, 195-201 (1994).
- 700
- 701 9. Hoff EJ, Vandeveld M. Non-suppurative encephalomyelitis in cats suggestive of a viral origin.  
702 *Vet Pathol* **18**, 170-180 (1981).
- 703
- 704 10. De Bosschere H, Roels S, Vanopdenbosch E, Bode L, Ludwig H. The first case of Borna disease  
705 virus infection in a Belgian cat. *Intern J Appl Res Vet Med* **2**, 189-194 (2004).
- 706
- 707 11. Nowotny N, Weissenböck H. Description of feline nonsuppurative meningoencephalomyelitis  
708 ("staggering disease") and studies of its etiology. *J Clin Microbiol* **33**, 1668-1669 (1995).
- 709
- 710 12. Degiorgis MP, Berg AL, Hard Af Segerstad C, Morner T, Johansson M, Berg M. Borna disease in  
711 a free-ranging lynx (*Lynx lynx*). *J Clin Microbiol* **38**, 3087-3091 (2000).
- 712
- 713 13. Truyen U, Stockhofe-Zurwieden N, Kaaden OR, Pohlenz J. A case report: encephalitis in lions.  
714 Pathological and virological findings. *Dtsch Tierärztl Wochenschr* **97**, 89-91 (1990).
- 715

- 716 14. Ström B, Andren B, Lundgren AL. Idiopathic non-suppurative meningoencephalomyelitis  
717 (staggering disease) in the Swedish cat: a study of 33 cases. *Europ J Compan Anim Practice* **3**,  
718 9-13 (1992).
- 719  
720 15. Lundgren AL. Feline non-suppurative meningoencephalomyelitis. A clinical and pathological  
721 study. *J Comp Pathol* **107**, 411-425 (1992).
- 722  
723 16. Lundgren AL, Lindberg R, Ludwig H, Gosztonyi G. Immunoreactivity of the central nervous  
724 system in cats with a Borna disease-like meningoencephalomyelitis (staggering disease). *Acta*  
725 *Neuropathol* **90**, 184-193 (1995).
- 726  
727 17. Rubbenstroth D, Schlottau K, Schwemmler M, Rissland J, Beer M. Human bornavirus research:  
728 Back on track! *PLoS Pathog* **15**, e1007873 (2019).
- 729  
730 18. Lundgren AL, Ludwig H. Clinically diseased cats with non-suppurative  
731 meningoencephalomyelitis have Borna disease virus-specific antibodies. *Acta Vet Scand* **34**,  
732 101-103 (1993).
- 733  
734 19. Lundgren AL, *et al.* Staggering disease in cats: isolation and characterization of the feline Borna  
735 disease virus. *J Gen Virol* **76 ( Pt 9)**, 2215-2222 (1995).
- 736  
737 20. Lutz H, *et al.* Borna disease virus infection in cats: ABCD guidelines on prevention and  
738 management. *J Feline Med Surg* **17**, 614-616 (2015).
- 739  
740 21. Wensman JJ, Berg M, Berg AL. Experiences of Borna disease virus infection in Sweden. *APMIS*  
741 *Suppl* **124**, 46-49 (2008).
- 742  
743 22. Wensman JJ, *et al.* Markers of Borna disease virus infection in cats with staggering disease. *J*  
744 *Feline Med Surg* **14**, 573-582 (2012).
- 745  
746 23. Wensman JJ, Jaderlund KH, Holst BS, Berg M. Borna disease virus infection in cats. *Vet J* **201**,  
747 142-149 (2014).
- 748  
749 24. Dürrwald R, Kolodziejek J, Herzog S, Nowotny N. Meta-analysis of putative human bornavirus  
750 sequences fails to provide evidence implicating Borna disease virus in mental illness. *Rev Med*  
751 *Virol* **17**, 181-203 (2007).
- 752  
753 25. Dürrwald R, Kolodziejek J, Muluneh A, Herzog S, Nowotny N. Epidemiological pattern of  
754 classical Borna disease and regional genetic clustering of Borna disease viruses point towards  
755 the existence of to-date unknown endemic reservoir host populations. *Microbes Infect* **8**, 917-  
756 929 (2006).
- 757  
758 26. Hoffmann B, *et al.* A variegated squirrel bornavirus associated with fatal human encephalitis.  
759 *N Engl J Med* **373**, 154-162 (2015).
- 760

- 761 27. Schlottau K, *et al.* Fatal encephalitic Borna disease virus 1 in solid-organ transplant recipients.  
762 *N Engl J Med* **379**, 1377-1379 (2018).
- 763  
764 28. Forth LF, *et al.* Novel picornavirus in lambs with severe encephalomyelitis. *Emerg Infect Dis* **25**,  
765 963-967 (2019).
- 766  
767 29. Pfaff F, *et al.* A novel astrovirus associated with encephalitis and ganglionitis in domestic sheep.  
768 *Transbound Emerg Dis* **64**, 677-682 (2017).
- 769  
770 30. Bennett AJ, *et al.* Relatives of rubella virus in diverse mammals. *Nature* **586**, 424-428 (2020).
- 771  
772 31. Bennett AJ, *et al.* Author Correction: Relatives of rubella virus in diverse mammals. *Nature* **588**,  
773 E2 (2020).
- 774  
775 32. Wylezich C, Papa A, Beer M, Höper D. A versatile sample processing workflow for metagenomic  
776 pathogen detection. *Sci Rep* **8**, 13108 (2018).
- 777  
778 33. Hobman TC. Rubella virus. In: *Fields Virology* (eds Knipe DM, Howley PM). 6th edn. Lippincott  
779 Williams & Wilkins (2013).
- 780  
781 34. Pfaff F, *et al.* Revisiting rustrela virus: new cases of encephalitis and a solution to the capsid  
782 enigma. *Microbiol Spectr* **10**, e0010322 (2022).
- 783  
784 35. Berg AL, Reid-Smith R, Larsson M, Bonnett B. Case control study of feline Borna disease in  
785 Sweden. *Vet Rec* **142**, 715-717 (1998).
- 786  
787 36. Sigrist B, Geers J, Albin S, Rubbenstroth D, Wolfrum N. A new multiplex real-time RT-PCR for  
788 simultaneous detection and differentiation of avian bornaviruses. *Viruses* **13**, 1358 (2021).
- 789  
790 37. Schulze V, *et al.* Borna disease outbreak with high mortality in an alpaca herd in a previously  
791 unreported endemic area in Germany. *Transbound Emerg Dis* **67**, 2093-2107 (2020).
- 792  
793 38. Niller HH, *et al.* Zoonotic spillover infections with Borna disease virus 1 leading to fatal human  
794 encephalitis, 1999-2019: an epidemiological investigation. *Lancet Infect Dis* **20**, 467-477  
795 (2020).
- 796  
797 39. Kolodziejek J, Dürrwald R, Herzog S, Ehrensperger F, Lussy H, Nowotny N. Genetic clustering of  
798 Borna disease virus natural animal isolates, laboratory and vaccine strains strongly reflects  
799 their regional geographical origin. *J Gen Virol* **86**, 385-398 (2005).
- 800  
801 40. Binder F, *et al.* Spatial and temporal evolutionary patterns in Puumala orthohantavirus (PUUV)  
802 S segment. *Pathogens* **9**, 548 (2020).
- 803

- 804 41. Johne R, *et al.* Rat hepatitis E virus: geographical clustering within Germany and serological  
805 detection in wild Norway rats (*Rattus norvegicus*). *Infect Genet Evol* **12**, 947-956 (2012).
- 806
- 807 42. Olsson GE, *et al.* Human hantavirus infections, Sweden. *Emerg Infect Dis* **9**, 1395-1401 (2003).
- 808
- 809 43. Ecke F, Hörnfeldt B. Miljöövervakning av smågnagare. Preprint at [http://www.slu.se/mo-](http://www.slu.se/mo-smagnagare)  
810 [smagnagare](http://www.slu.se/mo-smagnagare) (2022).
- 811
- 812 44. Schlegel M, Ali HS, Stieger N, Groschup MH, Wolf R, Ulrich RG. Molecular identification of small  
813 mammal species using novel cytochrome B gene-derived degenerated primers. *Biochem Genet*  
814 **50**, 440-447 (2012).
- 815
- 816 45. Hoffmann B, Depner K, Schirrmeier H, Beer M. A universal heterologous internal control  
817 system for duplex real-time RT-PCR assays used in a detection system for pestiviruses. *J Virol*  
818 *Methods* **136**, 200-209 (2006).
- 819
- 820 46. Krueger F, James F, Ewels P, Afyounian E, Schuster-Boeckler B. FelixKrueger/TrimGalore:  
821 v0.6.7. doi 10.5281/zenodo.5127899 (2021).
- 822
- 823 47. Schmieder R, Edwards R. Quality control and preprocessing of metagenomic datasets.  
824 *Bioinformatics* **27**, 863-864 (2011).
- 825
- 826 48. Bankevich A, *et al.* SPAdes: a new genome assembly algorithm and its applications to single-  
827 cell sequencing. *J Comput Biol* **19**, 455-477 (2012).
- 828
- 829 49. Grimwood RM, Holmes EC, Geoghegan JL. A novel rubi-like virus in the Pacific electric ray  
830 (*Tetronarce californica*) reveals the complex evolutionary history of the *Matonaviridae*. *Viruses*  
831 **13**, 585 (2021).
- 832
- 833 50. Edgar RC. MUSCLE: multiple sequence alignment with high accuracy and high throughput.  
834 *Nucleic Acids Res* **32**, 1792-1797 (2004).
- 835
- 836 51. Minh BQ, *et al.* IQ-TREE 2: New models and efficient methods for phylogenetic inference in the  
837 genomic era. *Mol Biol Evol* **37**, 1530-1534 (2020).
- 838
- 839 52. Hoang DT, Chernomor O, von Haeseler A, Minh BQ, Vinh LS. UFBoot2: Improving the ultrafast  
840 bootstrap approximation. *Mol Biol Evol* **35**, 518-522 (2018).
- 841
- 842 53. Katoh K, Standley DM. MAFFT multiple sequence alignment software version 7: improvements  
843 in performance and usability. *Mol Biol Evol* **30**, 772-780 (2013).
- 844
- 845 54. Haas B, Becht H, Rott R. Purification and properties of an intranuclear virus-specific antigen  
846 from tissue infected with Borna disease virus. *J Gen Virol* **67 ( Pt 2)**, 235-241 (1986).
- 847

848 55. Fischer K, *et al.* Indirect ELISA based on Hendra and Nipah virus proteins for the detection of  
849 henipavirus specific antibodies in pigs. *PLoS One* **13**, e0194385 (2018).

850

851
